# Supplementary material for: Influence of the Molecular Weight of the Polycarbonate Polyol on the Intrinsic Self-Healing at 20 °C of Polyurethanes
Source: Preprints.org preprint supplement (doi:10.20944/preprints202408.1906.v1), 2024-08-27
Supplement: Supplementary file 1 [file supplementary]

**Influence of the molecular weight of the polycarbonate polyol on the intrinsic self-healing at 20 ºC of polyurethanes**

*Yuliet Paez-Amieva, José Miguel Martín-Martínez*

**Supplementary material**

**Figure S1.** DSC curves of PUs made with polycarbonates of different molecular weights. Second heating run.

**Figure S2.** TGA curves of PUs made with polycarbonates of different molecular weights.

**Table S1.** Main diffraction peaks of the PUs made with polycarbonates of different molecular weights. X-ray diffraction experiments.

| PU | 2θ (°) | Intensity (a.u.) | 2θ (°) | Intensity (a.u.) |
| --- | --- | --- | --- | --- |
| YC500 | 19.9 | 3114 | - | - |
| YC1000 | 20.0 | 1516 | 23.3 | 1763 |
| YC2000 | 20.1 | 8438 | 23.3 | 4951 |
